# Supplementary material
Source: PubMed Central journal article supplement (PMC1863492)
Supplement: pnas_0611261104_1.pdf [file pnas_0611261104_1.pdf]

Table 2. Composition of algae media for two nutrient conditions

| Compound                                                | High Quality (HiQ)<br>(N:P=15:1) |                                         | Low Quality (LoQ)<br>(N:P = 110:1) |                                         |
|---------------------------------------------------------|----------------------------------|-----------------------------------------|------------------------------------|-----------------------------------------|
|                                                         | Stock,<br>g·liter <sup>-1</sup>  | Final medium,<br>mg·liter <sup>-1</sup> | Stock,<br>g·liter <sup>-1</sup>    | Final medium,<br>mg·liter <sup>-1</sup> |
| CaCl <sub>2</sub> ·H <sub>2</sub> O                     | 36.76                            | 36.76                                   | 36.76                              | 36.76                                   |
| MgSO <sub>4</sub> ·7H <sub>2</sub> O                    | 36.97                            | 36.97                                   | 36.97                              | 36.97                                   |
| K <sub>2</sub> HPO <sub>4</sub>                         | 11.60                            | 11.60                                   | 1.58                               | 1.58                                    |
| NaNO <sub>3</sub>                                       | 85.01                            | 85.01                                   | 85.01                              | 85.01                                   |
| NaHCO <sub>3</sub>                                      | 12.60                            | 12.60                                   | 12.60                              | 12.60                                   |
| Na <sub>2</sub> SiO <sub>3</sub> ·9H <sub>2</sub> O     | 28.42                            | 28.42                                   | 28.42                              | 28.42                                   |
| KCl                                                     | 0                                | 0                                       | 8.57                               | 8.57                                    |
| Na <sub>2</sub> EDTA·2H <sub>2</sub> O                  | 4.36                             | 4.36                                    | 4.36                               | 4.36                                    |
|                                                         | Trace Elements                   |                                         |                                    |                                         |
| FeCl <sub>3</sub> ·H <sub>2</sub> O                     | 3.15                             | 3.15                                    | 3.15                               | 3.15                                    |
| MnCl <sub>2</sub> ·4H <sub>2</sub> O                    | 0.18                             | 0.18                                    | 0.18                               | 0.18                                    |
| CuSO <sub>4</sub> ·5H <sub>2</sub> O                    | 0.01                             | 0.01                                    | 0.01                               | 0.01                                    |
| ZnSO <sub>4</sub> ·7H <sub>2</sub> O                    | 0.022                            | 0.022                                   | 0.022                              | 0.022                                   |
| CoCl <sub>2</sub> ·6H <sub>2</sub> O                    | 0.01                             | 0.01                                    | 0.01                               | 0.01                                    |
| MoO <sub>24</sub> (6NH <sub>4</sub> )·4H <sub>2</sub> O | 0.006                            | 0.006                                   | 0.006                              | 0.006                                   |
|                                                         | Vitamins                         |                                         |                                    |                                         |
| Biotin                                                  | 0.005                            | 0.005                                   | 0.005                              | 0.005                                   |
| Thiamin                                                 | 0.1                              | 0.1                                     | 0.1                                | 0.1                                     |
| Pyridoxine                                              | 0.1                              | 0.1                                     | 0.1                                | 0.1                                     |
| Pyridoxamine                                            | 0.003                            | 0.003                                   | 0.003                              | 0.003                                   |
| Calcium Panthothenate                                   | 0.25                             | 0.25                                    | 0.25                               | 0.25                                    |
| B12                                                     | 0.001                            | 0.001                                   | 0.001                              | 0.001                                   |
| Nicotinic Acid                                          | 0.05                             | 0.05                                    | 0.05                               | 0.05                                    |
| Nicotinamide                                            | 0.05                             | 0.05                                    | 0.05                               | 0.05                                    |
| Folic Acid                                              | 0.02                             | 0.02                                    | 0.02                               | 0.02                                    |
| Riboflavin                                              | 0.03                             | 0.03                                    | 0.03                               | 0.03                                    |
| Inositol                                                | 0.09                             | 0.09                                    | 0.09                               | 0.09                                    |

Table 2. Composition of Daphnia media for maintenance cultures and experiments

| Compound                                            | COMBO (maintenance cultures) |                         | P-free COMBO    |                         |
|-----------------------------------------------------|------------------------------|-------------------------|-----------------|-------------------------|
|                                                     | Stock (g/liter)              | Final medium (mg/liter) | Stock (g/liter) | Final medium (mg/liter) |
| CaCl <sub>2</sub> ·H <sub>2</sub> O                 | 36.76                        | 36.76                   | 36.76           | 36.76                   |
| MgSO <sub>4</sub> ·7H <sub>2</sub> O                | 36.97                        | 36.97                   | 36.97           | 36.97                   |
| K <sub>2</sub> HPO <sub>4</sub>                     | 8.71                         | 8.71                    | 0               | 0                       |
| NaNO <sub>3</sub>                                   | 85.01                        | 85.01                   | 85.01           | 85.01                   |
| NaHCO <sub>3</sub>                                  | 12.60                        | 12.60                   | 12.60           | 12.60                   |
| Na <sub>2</sub> SiO <sub>3</sub> ·9H <sub>2</sub> O | 28.42                        | 28.42                   | 28.42           | 28.42                   |
| H <sub>3</sub> BO <sub>3</sub>                      | 24.00                        | 24.00                   | 24.00           | 24.00                   |
| KCl                                                 | 0                            | 0                       | 8.57            | 8.57                    |
| NaSe <sub>2</sub> O <sub>3</sub>                    | 0.002                        | 0.002                   | 0.002           | 0.002                   |
|                                                     | Animal trace elements        |                         |                 |                         |
| LiCl                                                | 0.155                        | 0.155                   | 0.155           | 0.155                   |
| RbCl                                                | 0.07                         | 0.07                    | 0.07            | 0.07                    |
| SrCl <sub>2</sub> ·6H <sub>2</sub> O                | 0.15                         | 0.15                    | 0.15            | 0.15                    |
| NaBr                                                | 0.016                        | 0.016                   | 0.016           | 0.016                   |
| KI                                                  | 0.0033                       | 0.0033                  | 0.0033          | 0.0033                  |
