# Supplementary material
Source: PubMed Central journal article supplement (PMC1863492)
Supplement: pnas_0611261104_2.pdf [file pnas_0611261104_2.pdf]

Table 3. Composition of Daphnia media for maintenance cultures and experiments

| Compound                                            | COMBO (maintenance cultures) |                                      | P-free COMBO                 |                                   |
|-----------------------------------------------------|------------------------------|--------------------------------------|------------------------------|-----------------------------------|
|                                                     | Stock, g·liter <sup>-1</sup> | Final medium, mg·liter <sup>-1</sup> | Stock, g·liter <sup>-1</sup> | Final medium, liter <sup>-1</sup> |
| CaCl <sub>2</sub> ·H <sub>2</sub> O                 | 36.76                        | 36.76                                | 36.76                        | 36.76                             |
| MgSO <sub>4</sub> ·7H <sub>2</sub> O                | 36.97                        | 36.97                                | 36.97                        | 36.97                             |
| K <sub>2</sub> HPO <sub>4</sub>                     | 8.71                         | 8.71                                 | 0                            | 0                                 |
| NaNO <sub>3</sub>                                   | 85.01                        | 85.01                                | 85.01                        | 85.01                             |
| NaHCO <sub>3</sub>                                  | 12.60                        | 12.60                                | 12.60                        | 12.60                             |
| Na <sub>2</sub> SiO <sub>3</sub> ·9H <sub>2</sub> O | 28.42                        | 28.42                                | 28.42                        | 28.42                             |
| H <sub>3</sub> BO <sub>3</sub>                      | 24.00                        | 24.00                                | 24.00                        | 24.00                             |
| KCl                                                 | 0                            | 0                                    | 8.57                         | 8.57                              |
| NaSe <sub>2</sub> O <sub>3</sub>                    | 0.002                        | 0.002                                | 0.002                        | 0.002                             |
|                                                     | Animal trace elements        |                                      |                              |                                   |
| LiCl                                                | 0.155                        | 0.155                                | 0.155                        | 0.155                             |
| RbCl                                                | 0.07                         | 0.07                                 | 0.07                         | 0.07                              |
| SrCl <sub>2</sub> ·6H <sub>2</sub> O                | 0.15                         | 0.15                                 | 0.15                         | 0.15                              |
| NaBr                                                | 0.016                        | 0.016                                | 0.016                        | 0.016                             |
| KI                                                  | 0.0033                       | 0.0033                               | 0.0033                       | 0.0033                            |
